# Supplementary material for: Delphi consensus on the transition from pediatric to adult care in Italian ADHD youth
Source: Research Square preprint supplement (doi:10.21203/rs.3.rs-5677237/v1), 2025-04-29
Supplement: Supplementary file 1 [file ca01035f9bf28701ed5451b8.docx]

*European Child & Adolescent Psychiatry*

**Delphi consensus on the transition from pediatric to adult care in Italian ADHD youth**

**Appendix A. and B.**

**Authors:** Elisa Roberti1, Antonio Clavenna1*, Eleonora Basso2, Francesca Scarpellini3, Rita Campi1, Michele Giardino4, Michele Zanetti4 & Maurizio Bonati1, on behalf of the **TransiDEA Group.**

1Laboratory of Child Health and Development Epidemiology, Department of Medical Epidemiology, Istituto di Ricerche Farmacologiche Mario Negri IRCCS, Milan, Italy.

2Child Neuropsychiatry Unit, Department of Health Sciences, ASST Santi Paolo e Carlo, San Paolo Hospital, Università degli Studi di Milano, Milan, Italy

3Centro Psicodiagnostico Italiano, Milan, Italy

4Information Science for Clinical Knowledge Sharing Unit, Department of Medical Epidemiology, Istituto di Ricerche Farmacologiche Mario Negri IRCCS, Milan, Italy.

***Corresponding author:** Elisa Roberti. Laboratory of Child Health and Development Epidemiology, Department of Medical Epidemiology, Istituto di Ricerche Farmacologiche Mario Negri IRCCS, Via Mario Negri 2, 20156 Milan, Italy, e-mail: [elisa.roberti@marionegri.it](mailto:elisa.roberti@marionegri.it)

**Appendix A.**

**Delphi consensus on the transition from pediatric to adult care in Italian ADHD youth**

First draft of the 26 statements initially included in the shared document as presented to the panel to record ratings and comments.

**Transition care between adolescent and adult services for young people with chronic health needs in Italy**

Shared recommendations drafted within the project, “Transition care between adolescent and adult services for young people with chronic health needs in Italy- RF-2019-12371228” (TransiDEA, https://transitioncare.marionegri.it/).

Completion takes about 15 to 20 minutes.

You will be asked to indicate how much you agree with the utility of including certain statements in a protocol for the transition from Child and Adolescent Mental Health Services (CAMHS) to Adult Mental Health Services (AMHS) (transition).

A scale of 1 (not at all agree) to 5 (“strongly agree”) will be used.

If you have comments or observations, write them in the space provided for notes. Filling out this part will be particularly helpful in figuring out whether and how to modify the proposed items, so we encourage you to include any thoughts or considerations based on your experience.

Try to answer all of the items. Where it is not possible for you, please indicate the reason in the notes.

SECTION 1 – PLANNING

|  | | Non at  all agree | Strongly  agree |
| --- | --- | --- | --- |
| 1. The need for an individual patient to be sent to an AMHS must be evaluated on a case-by-case basis starting from the age of 16. | | | 1 | 2 | 3 | 4 | 5 | | --- | --- | --- | --- | --- | |  |  |  |  |  | | |
| COMMENTS: | | | |
| 2. Transition planning should be tailored based on: |  | | |
| 1. cognitive abilities and communication needs; | | | 1 | 2 | 3 | 4 | 5 | | --- | --- | --- | --- | --- | |  |  |  |  |  | | |
| 1. **clinical needs:** identify AMHS in relation to clinical needs (severity of symptomatology, side effects of therapy, previous medical situations, other ongoing therapies that might interfere) including possible second-tier services; | | | 1 | 2 | 3 | 4 | 5 | | --- | --- | --- | --- | --- | |  |  |  |  |  | | |
| 1. **psychological status:** consider the condition’s stage and propose transition in a period of stability and not clinical acuity. Pay attention to the young person's psychological experience, including anxiety, fear, mood, perception of self and condition, gender perception discomfort, self-esteem; | | | 1 | 2 | 3 | 4 | 5 | | --- | --- | --- | --- | --- | |  |  |  |  |  | | |
| 1. **social and personal situation:** consider the socioeconomic level of the family, level of involvement within a social network, experience with the peer group (assess the presence of withdrawal/isolation, bullying episodes) and in recreational activities, negative thoughts, suicide risk or self-harm, lifestyle (substance and alcohol use), family situation (separated parents/availability of parents or caregivers); | | | 1 | 2 | 3 | 4 | 5 | | --- | --- | --- | --- | --- | |  |  |  |  |  | | |
| 1. **caring responsibilities:** consider the young person's level of personal and social autonomy and the advisability of involving specific figures (e.g., parents) more or less directly, with the young person's consent; | | | 1 | 2 | 3 | 4 | 5 | | --- | --- | --- | --- | --- | |  |  |  |  |  | | |
| 1. **educational and professional needs:** consider the possible need for support in the professional sphere (e.g., accompaniment into a work context) or study, with possible involvement of educational figures; pay attention to the content of reports sent to schools (e.g., respect desire not to share some personal information); reconcile appointment times with school and professional commitments. | | | 1 | 2 | 3 | 4 | 5 | | --- | --- | --- | --- | --- | |  |  |  |  |  | | |
| COMMENTS: | | | |
| 3. Young people transitioning from CAMHS to AMHS should be assigned a caseworker (“**named worker**”) who is responsible for coordinating care during the transition from the earliest stages and making sure that transfer to AMHS is successful. | | | 1 | 2 | 3 | 4 | 5 | | --- | --- | --- | --- | --- | |  |  |  |  |  | | |
| COMMENTS: | |  | |
| 4. The **named worker** should be someone with experience in transition pathways and from within the CAMHS, providing care and support to the young person and taking a coordinating role between services. | | | 1 | 2 | 3 | 4 | 5 | | --- | --- | --- | --- | --- | |  |  |  |  |  | | |
| COMMENTS: | |  | |
| 5. The young person should express agreement in choosing their assigned **named worker** (and express preferences regarding their gender). This could be a nurse, health professional, or other health or social worker (note: the transition process is lengthy, and it is expected that the named worker may change over time, but this should be notified to the patient). | | | 1 | 2 | 3 | 4 | 5 | | --- | --- | --- | --- | --- | |  |  |  |  |  | | |
| COMMENTS: | |  | |
| 6. CAMHS and AMHS must agree on an inter-service “**Care Agreement**” to ensure that youth begin transition planning with clinicians and social workers when they turn 16 years of age. | | | 1 | 2 | 3 | 4 | 5 | | --- | --- | --- | --- | --- | |  |  |  |  |  | | |
| COMMENTS: | |  | |
| 7. Young people should be duly informed about what the transition process is and what it will entail for them. The information will also be summarized in a “**Transition Information Sheet.**” | | | 1 | 2 | 3 | 4 | 5 | | --- | --- | --- | --- | --- | |  |  |  |  |  | | |
| COMMENTS: | |  | |
| 8. The inter-service agreement must be shared with and approved by the young adult about to transition, including informing them of the possible change in care management in an AMHS (e.g., regarding privacy and consent). | | | 1 | 2 | 3 | 4 | 5 | | --- | --- | --- | --- | --- | |  |  |  |  |  | | |
| COMMENTS: | |  | |
| 9. Young people should be provided with a “**Transition Readiness Questionnaire**” that they can fill out from the age of 16 to check their readiness for transition. The tool can be useful for both the young adult and the caregiver to make explicit and understand health status, how to navigate the health care system, and to indicate areas where they would like to learn more. | | | 1 | 2 | 3 | 4 | 5 | | --- | --- | --- | --- | --- | |  |  |  |  |  | | |
| COMMENTS: | |  | |
| 10. Young people should be provided with a “**Transition Plan**,” i.e., a tool they can update with: results of their questionnaires, meetings, transition milestones/timing, names and contact information of the named worker, and information about their medications. | | | 1 | 2 | 3 | 4 | 5 | | --- | --- | --- | --- | --- | |  |  |  |  |  | | |
| COMMENTS: | |  | |
| 11. CAMHS should schedule **meetings every six months** (in person preferably, remotely if necessary) starting at age 16. | | | 1 | 2 | 3 | 4 | 5 | | --- | --- | --- | --- | --- | |  |  |  |  |  | | |
| COMMENTS: | |  | |
| 12. The young adults, their parents or carers and clinicians involved in the transition (named worker, CAMHS workers and, where already identified, adult AMHS workers) should be involved in these semiannual meetings. | | | 1 | 2 | 3 | 4 | 5 | | --- | --- | --- | --- | --- | |  |  |  |  |  | | |
| COMMENTS: | |  | |
| 13. The young adults should be treated as equal partners, and their opinions should be taken into consideration. | | | 1 | 2 | 3 | 4 | 5 | | --- | --- | --- | --- | --- | |  |  |  |  |  | | |
| COMMENTS: | |  | |
| 14. It is necessary to hold an **annual meeting between** clinicians of **the** **two services** to identify any problems that have arisen during the transition process and strategies for improvement. | | | 1 | 2 | 3 | 4 | 5 | | --- | --- | --- | --- | --- | |  |  |  |  |  | | |
| COMMENTS: | |  | |
| 15. During these annual meetings the young adults’ situation should be assessed in terms of: clinical needs, psychological status, social and personal situation, educational and professional needs, cognitive abilities, and communication needs. | | | 1 | 2 | 3 | 4 | 5 | | --- | --- | --- | --- | --- | |  |  |  |  |  | | |
| COMMENTS: | |  | |
| 16. CAMHS providers should have a **registry** available to monitor transitioning youth. | | | 1 | 2 | 3 | 4 | 5 | | --- | --- | --- | --- | --- | |  |  |  |  |  | | |
| COMMENTS: | |  | |

SECTION 2 – PASSAGE

|  | Non at  all agree | Strongly  agree |
| --- | --- | --- |
| 17. **Transition** should occur **when the young person is ready** based on assessment of the clinical picture or the Transition Readiness Questionnaires. Normally this transition should take place by the time the young person reaches the age of 18, except in special cases when it is deemed necessary to extend CAMHS care. | | 1 | 2 | 3 | 4 | 5 | | --- | --- | --- | --- | --- | |  |  |  |  |  | | |
| COMMENTS: | | |
| 18. CAMHS should promptly check that the **referral** was **successful** (i.e., that the young person attended the first meeting arranged with the AMHS). | | 1 | 2 | 3 | 4 | 5 | | --- | --- | --- | --- | --- | |  |  |  |  |  | | |
| COMMENTS: |  | |
| 19. If the referral does not result successful, the AMHS should report this to the CAMHS named worker, who contacts the young person to **understand the reasons and identify possible solutions**. | | 1 | 2 | 3 | 4 | 5 | | --- | --- | --- | --- | --- | |  |  |  |  |  | | |
| COMMENTS: |  | |
| 20. If the young person is not comfortable with the selected service, possible **alternatives** should be identified and proposed to address therapeutic needs. | | 1 | 2 | 3 | 4 | 5 | | --- | --- | --- | --- | --- | |  |  |  |  |  | | |
| COMMENTS: |  | |
| 21. At the first appointment at the AMSH, make sure young people are asked if they have any **concerns** or need clarification with respect to the new service's approach to care. | | 1 | 2 | 3 | 4 | 5 | | --- | --- | --- | --- | --- | |  |  |  |  |  | | |
| COMMENTS: |  | |

SECTION 3 – MONITORING

|  | Non at  all agree | Strongly  agree |
| --- | --- | --- |
| 22**. Six months after the transition**, it is useful to arrange an **assessment meeting** between the young adults and their named worker to identify any issues that have arisen during the transition and to improve transition pathways. | | 1 | 2 | 3 | 4 | 5 | | --- | --- | --- | --- | --- | |  |  |  |  |  | | |
| COMMENTS: |  | |
| 23. AMHS should **send feedback** to CAMHS one year after referral by filling out a “Transition Evaluation Form for Clinicians.” | | 1 | 2 | 3 | 4 | 5 | | --- | --- | --- | --- | --- | |  |  |  |  |  | | |
| COMMENTS: |  | |

SECTION 4 – SERVICES

|  | | Non at  all agree | Strongly  agree |
| --- | --- | --- | --- |
| 24. Each service (both CAMHS and AMHS) must provide **training** for its clinicians on the appropriate management of the ADHD patient, particularly with regard to treatment. | | | 1 | 2 | 3 | 4 | 5 | | --- | --- | --- | --- | --- | |  |  |  |  |  | | |
| COMMENTS: | |  | |
| 25. Each service (both CAMHS and AMHS) must also ensure that forms are updated in relation to the young adult’s change in legal status upon reaching the age of 18. | | | 1 | 2 | 3 | 4 | 5 | | --- | --- | --- | --- | --- | |  |  |  |  |  | | |
| COMMENTS: | |  | |
| 26. Each service must **annually assess the outcome of transition pathways**, defined as: |  | | |
| 1. Satisfaction with transition and transfer planning reported by young adults and their caregivers (parents, caregivers, social workers). | | | 1 | 2 | 3 | 4 | 5 | | --- | --- | --- | --- | --- | |  |  |  |  |  | | |
| 1. Number of young adults who continue to be in AMHS care 1 year after transfer from CAMHS, compared with the expected number of patients. | | | 1 | 2 | 3 | 4 | 5 | | --- | --- | --- | --- | --- | |  |  |  |  |  | | |
| 1. Number of young adults transferred from CAMHS who do not attend the first meeting or appointment with an AMHS compared with the number of expected patients. | | | 1 | 2 | 3 | 4 | 5 | | --- | --- | --- | --- | --- | |  |  |  |  |  | | |
| COMMENTS: | |  | |

**Appendix B.**

**Table 1.** Agreement reached for each item in the **first round**.

| **ITEM** | **Groups 1-3** | | **Groups 4-5** | | **Totals** | |
| --- | --- | --- | --- | --- | --- | --- |
| ***% rating* 1-2** | ***% rating 4-5*** | ***% rating* 1-2** | ***% rating 4-5*** | ***% rating* 1-2** | ***% rating 4-5*** |
| 1 | 13 | 87 | 0 | 100 | 8 | 92 |
| 2a | 0 | 80 | 0 | 60 | 0 | **72** |
| 2b | 0 | 100 | 0 | 100 | 0 | 100 |
| 2c | 0 | **73** | 0 | 90 | 0 | 80 |
| 2d | 13 | 87 | 0 | 100 | 8 | 92 |
| 2e | 7 | 87 | 0 | 90 | 4 | 88 |
| 2f | 7 | 87 | 0 | 100 | 4 | 92 |
| 3 | 0 | 80 | 0 | 100 | 0 | 88 |
| 4 | 0 | 87 | 0 | 100 | 0 | 92 |
| 5 | 20 | **53** | 0 | 90 | 12 | **68** |
| 6 | 20 | **73** | 0 | 100 | 12 | 84 |
| 7 | 7 | 93 | 0 | 100 | 4 | 96 |
| 8 | 7 | **67** | 0 | 90 | 4 | 76 |
| 9 | 13 | **67** | 10 | **70** | 12 | **68** |
| 10 | 13 | 80 | 10 | 80 | 12 | 80 |
| 11 | 27 | **53** | 0 | 90 | 16 | **68** |
| 12 | 27 | **67** | 0 | 90 | 16 | 76 |
| 13 | 0 | 80 | 0 | 100 | 0 | 88 |
| 14 | 13 | 87 | 0 | 100 | 8 | 92 |
| 15 | 13 | 87 | 0 | 100 | 8 | 92 |
| 16 | 27 | **47** | 0 | 100 | 16 | **68** |
| 17 | 7 | **67** | 0 | 90 | 4 | 76 |
| 18 | 20 | **73** | 0 | 90 | 12 | 80 |
| 19 | 20 | 80 | 0 | 90 | 12 | 84 |
| 20 | 0 | **73** | 10 | 90 | 4 | 80 |
| 21 | 7 | 93 | 0 | 100 | 4 | 96 |
| 22 | 20 | **60** | 0 | 100 | 12 | 76 |
| 23 | 27 | **53** | 0 | 90 | 16 | **68** |
| 24 | 0 | 100 | 0 | 100 | 0 | 100 |
| 25 | 7 | 80 | 0 | 100 | 4 | 88 |
| 26a | 13 | 80 | 0 | 90 | 8 | 84 |
| 26b | 13 | **67** | 10 | **70** | 12 | **68** |
| 26c | 7 | **67** | 10 | 80 | 8 | **72** |

**Table 2.** Agreement reached for each item in the **second round**.

|  | *Do you approve of the change?* | |  |
| --- | --- | --- | --- |
| ITEM | *yes* | *no* | *Percentage of agreement (%)* |
| 1 | 25 | 1 | 96 |
| 2 | 25 | 1 | 96 |
| 3 | 26 | 0 | 100 |
| 4 | 25 | 1 | 96 |
| 5 | 26 | 0 | 100 |
| 6 | 25 | 1 | 96 |
| 7 | 26 | 0 | 100 |
| 8 | 26 | 0 | 100 |
| 9 | 25 | 1 | 96 |
| 10 | 24 | 2 | 92 |
| 11 | 22 | 4 | 85 |
| 12 | 25 | 1 | 96 |
| 13 | 24 | 2 | 92 |
| 14 | 23 | 3 | 88 |
| 15 | 22 | 4 | 85 |
| 16 | 24 | 2 | 92 |
| 17 | 25 | 1 | 96 |
| 18 | 24 | 2 | 92 |
| 19 | 26 | 0 | 100 |
| 20 | 24 | 2 | 92 |
| 21 | 26 | 0 | 100 |
| 22 | 26 | 0 | 100 |
| 23 | 24 | 2 | 92 |
| Appendix A | 26 | 0 | 100 |
| Appendix B | 24 | 2 | 92 |
| Appendix C | 26 | 0 | 100 |
| Appendix D | 26 | 0 | 100 |
| Appendix E | 26 | 0 | 100 |
| Appendix F/G | 26 | 0 | 100 |
